# Supplementary material
Source: Springer Nature journal article supplement (https://www.springermedizin.de/resource/supplementary/13023_2006_31_MOESM6_ESM.pdf/9641498)
Supplement: MOESM6 [file 9641498]

**ENUCLEATION** by an experienced

surgeon :

- sufficient resection optic nerve
- implant

Specialized onco-ophthalmologic evaluation to discuss the indication of a conservative approach in case of :

- screening in familial RB
- young age of the patient
- small tumor
- lack of posterior pole tumor
- multifocal retinoblastoma

**HISTOPATHOLOGIC** examination by an experienced pathologist :

- tumor sampling for molecular analysis
- complete examination of the eye

- microscopic extrascleral involvement
- involvement of the resection margin of the optic nerve

Chemotherapy  
orbital irradiation

- massive choroidal involvement and/or
- retrolaminar involvement of the optic nerve and/or
- anterior chamber involvement

Chemotherapy  
(debated)

- no or minimal choroidal involvement and/or
- no or prelaminar optic nerve involvement

No adjuvant treatment  
(debated)
